# Supplementary material for: Bayesian extreme value analysis of extreme sea levels along the German Baltic coast using historical information
Source: Copernicus journal article supplement (doi:10.5194/egusphere-2023-1122), 2023-06-12
Supplement: Supplementary file [file egusphere-2023-1122-AC1-supplement.pdf]

The authors would like to thank the reviewer for their comments. We appreciate the time taken to read through the manuscript and provide specific comments to improve it. We have addressed each comment and listed all changes here. We believe the manuscript has greatly improved thanks to these suggestions.

#### General comments:

*Data:* The length of most of the hourly records does not seem to match the length of the GESLA3 records. Please provide the data sources used to extend the records.

Thanks for pointing this out. The analysis was first conducted using only data from GESLA3 but was later changed to include further systematic data provided by Schmidt et al. (2017), which was sourced from the local shipping authorities. We have include this source in Table 1, and updated the statement on data availability:

*“Systematic tide-gauge data was sourced from the GESLA-3 database (Haigh et al., 2022) in combination with data from MacPherson et al. (2019), provided by Kelln et al. (2017). The latter is available from local water and shipping authorities along the German Baltic Sea coast upon request.”*

*Data preparation and filtering:* A few short comments on the methods of data preparation and their potential influence on the results seem helpful for the reader. Specifically, these questions arise:

While certainly the easiest methods of detrending, extending the linear trend into the first half of the 19<sup>th</sup> century (line 168) seems prone to overestimate sea level rise in extended timespan due to possible acceleration between the 19<sup>th</sup> and 20<sup>th</sup> century. This requires at least a short discussion of the underlying assumptions and their uncertainties and whether other option to fill this gap (e.g. a quadratic trend) were tested.

This is a good point and we have re-examined our method to determine if there are any large biases due to our choice of extending the MSL trend linearly. At Travemünde and Warnemünde, the largest difference in the MSL signal extended using linear and quadratic fitting is approximately 1 cm. However, at Wismar, a maximum difference of approximately 5 cm is found. While this difference is noteworthy, we do not think it is necessary to perform the analysis again. Indeed, a quadratic trend may still not be the best choice, and examining a range of options would require significant work. However, we have noted these differences in the manuscript and included a short discussion highlighting potential biases caused by this assumption:

*“This method may not be the most appropriate due to accelerations in the rate of sea level rise. Although a quadratic trend results in differences of less than 1 cm at Travemünde and Warnemünde, at Wismar a maximum difference of approximately 5 cm is found. The use of a linear trend over a quadratic trend results in an increase to the AMAX samples not covered by the PSMSL data, which in turn leads to a positive bias of the final ESL estimates. However, it is unclear whether the quadratic trend would be better suited to the data, and in combination with the minor differences seen at Travemünde and Warnemünde, a linear trend is considered suitable for our purposes.”*

The authors explain sufficiently, why an additional threshold for the selection of the historic events is necessary, but find that no systematic method was able to derive an appropriate threshold for all tide

gauges. They therefore resort to a manual review of data. To understand the process of this selection, a description of the (possibly subjective) criteria for this review would be helpful to the reader.

The selection of the perception threshold is indeed subjective, and is based purely on intuitive decision-making by the authors given the available data. A description of this has been included in the manuscript. We agree that a more thorough description of this process should be included in the paper. We have inserted the following:

*“Given the lack of a clear physical threshold at any of the tested locations (e.g. a sea wall where all exceeding events are recorded), a threshold selection process was conducted based simply on the author’s intuitive reasoning. Factors that influenced the selection process include the magnitude and occurrence of ESLs in both the systematic and historical records and the length of the historical record in question. Keeping in mind the assumption that the historical record is exhaustive, and due to the subjective nature of this method, final perception thresholds were set conservatively high at 2.3 m at Flensburg, 2 m at Schleswig, 2.25 m at Eckernförde, 2.25 m at Kiel, 2.6 m at Travemünde, 2.25 m at Wismar and 2 m at Warnemünde. Historical ESLs that do not exceed the perception threshold cannot be used in the analysis, and are thus disregarded. These events are highlighted in Figure 2.”*

Furthermore, the consequences of this selection remain unclear until much later in the paper, where it is briefly mentioned that only the 1872 event remains at four stations after applying this threshold (line 355-357). This is important information for the reader and should be mentioned alongside the definition of the filter.

It is briefly mentioned in the original manuscript that all historical events that do not exceed the perception threshold are disregarded – “All historical information that lies below the perception threshold was disregarded.” (Line 192). To make the effect of this filter clearer to the reader, we have modified Figure 2 to highlight those events which have not been used in the analysis. Further, it appears that only 3 sites were conducted using only the 1872 event as a historical measurement (Eckernförde, Kiel and Warnemünde). We have also corrected this in the manuscript.

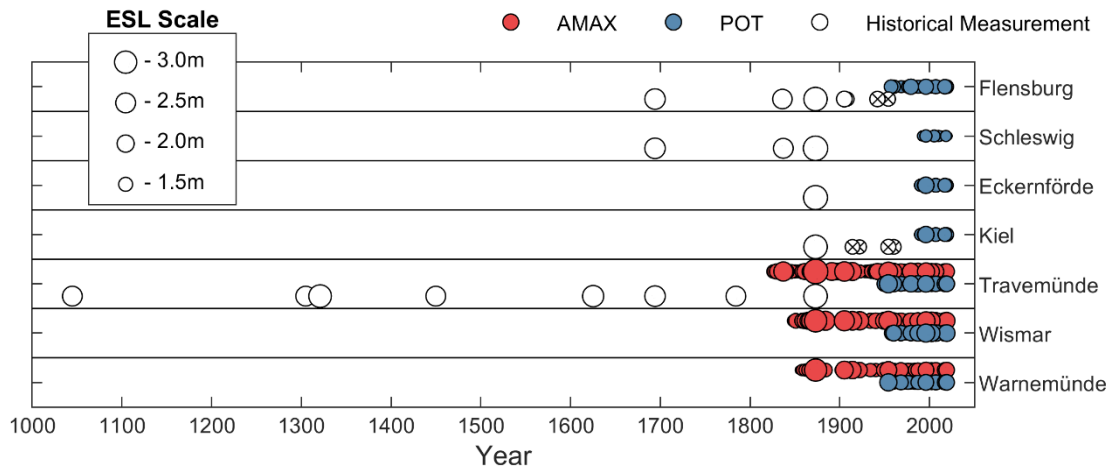

**Figure 2.** The extent of data available at all locations. Each circle denotes a sampled ESL with its size proportional to the event’s magnitude. All data has been detrended using MSL. Historical events which lie below the perception threshold and are thus disregarded in the final analysis are shown with a black cross.

In this context, it also is unclear which step of data preparation Fig. 2 depicts. Some parts of the data preparation (the extension of the AMAX timeseries) seems to have already been conducted, others (applying the threshold for historical data) not.

This is a good point and we have updated Figure 2 and its caption to inform the reader what data is actually shown (see above).

Results (ESL estimates): The results are presented in an overall clear and easy to understand fashion. Still, an addition to Fig. 4 would highlight the results of the study even more. I suggest to include the AMAX-GEV (Sys.+HI) estimate of Travemünde as well to show that the AMAX estimate benefits from the inclusion as well (even though the interpretation is limited by the availability of only one example). I further suggest adding a figure similar to Fig. 4, but depicting the HW1000 estimates, as supplementary material. These values are already given in Table 2, but I found Fig. 4 to enable a much easier comprehension of the findings. Therefore, the finding discussed in the text should also be appear in Fig. 4.

Thankyou for this comment and we made the suggested changes. Figure 4 now includes the AMAX-GEV (Syst + HI) analysis for Travemünde and we have split the figure into subplots which provide the HW200 and HW1000 estimates:

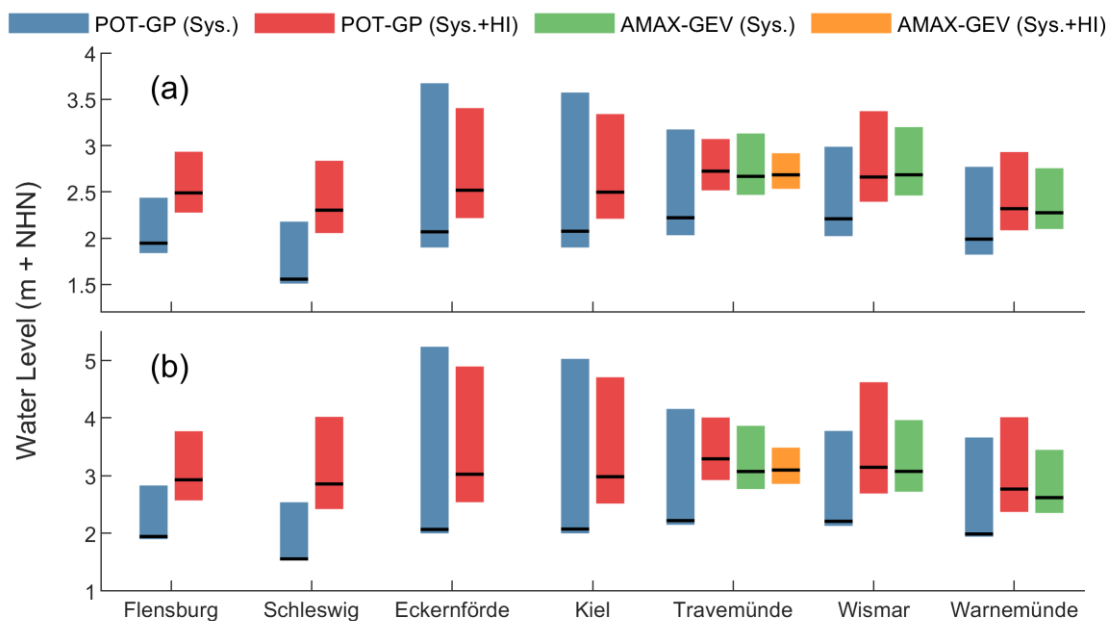

**Figure 4.** Comparison of (a) HW200 and (b) HW1000 estimates at all sites. Maximum likelihood estimates are shown as black horizontal lines. 95% credibility intervals are shown as colored bars. Where historical information is included, ESL estimates increase at all sites and credibility intervals are generally reduced. This occurs for both the POT-GP and AMAX-GEV analyses.

Results (ESL variability): The long-range dependence and importance of the 1872 event in sampling ESL data is already demonstrated sufficiently. While the assumption seems obvious to transfer this finding to ESL at the other tide gauges, the authors should comment on this assumption directly for example by determining the Hurst exponent for the Wismar and Warnemünde records as well to prove regional similarities or by referencing other sources discussing the variability.

We agree with this comment and performed the analysis at the two sites mentioned. Our findings have been included in the Manuscript in Section 4.2:

*“Similarly high Hurst exponents were found at Wismar (0.77) and Warnemünde (0.62). This suggests that there is persistency in the series of ESLs at Travemünde, Wismar and Warnemünde which can be seen as some long-term variability.”*

*Discussion:* Even though EVA not considering historical data is not the focus of the paper, the discussion would benefit from an evaluation of both methods, whenever possible. At least for the Flensburg tide gauge it would be interesting to see, how an EVA of AMAX data, constructed from the hourly record, performs in comparison to the POT-GP method. This would enable more thorough comments on some aspects already mentioned in the paper:

In the introduction it is mentioned, that the POT-GP method is generally preferred. Can this notion be confirmed for the German Baltic coast, if the length of the record is the same?

Confirming a better model is difficult as standard techniques such as using Bayesian Information Criteria (BIC) or similar, are not designed to handle two different samples, which is the case when we use two different methods to sample the same dataset. In any case, POT-GP generally performs better at maintaining reasonable uncertainties at the tails, which is supported by Arns et al. (2013) and Wahl et al. (2017). In reality, either choice would provide sufficient results for our study site, but we decided to employ the POT-GP method as we were already forced to use AMAX-GEV for the longer AMAX data set. In this way, we could demonstrate the method for the two most common approaches to EVA. This is an interesting point however, and we have included a comparison of the POT-GP and AMAX-GEV approaches in Appendix A: ESL Sampling:

*“In this study, we employ two different approaches for sampling ESLs. The first technique, POT is generally preferred in literature for reasons explained in Section 2.2. Wahl et al. (2017) also note that AMAX sampling may result in larger uncertainties at the tails of the distribution when sea level records are short. While we are constrained by the records sourced from MLUV (2012), which are only available as AMAX samples, this is not the case for the high-resolution tide-gauge data. Thus, we decided to employ POT sampling for these records due to their preference in literature, and so that we may demonstrate the use of the Bayesian MCMC EVA method for both POT-GP and AMAX-GEV approaches. To directly compare the two approaches, we also performed an AMAX-GEV analysis using the high-resolution tide-gauge data. Figure A1 shows ESL estimates including 95% credibility intervals estimated at each site using the high-resolution tide-gauge data only. At all sites, the AMAX-GEV method results in larger estimates of ESLs at high return periods. Also of note are the larger uncertainties at the tails of the distribution at all sites except for Warnemünde, which supports the findings of Wahl et al. (2017). In general, the POT-GP appears to produce more reliable results based purely on the reduced uncertainties.”*

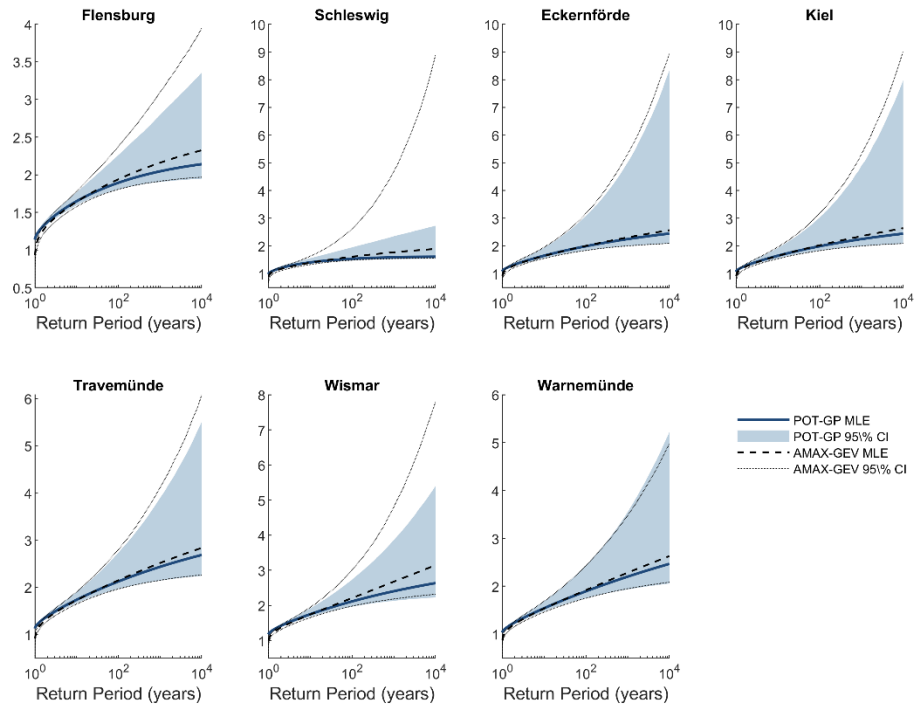

**Figure A1.** Comparison of POT-GP and AMAX-GEV approaches to the Bayesian MCMC method for estimating ESLs. At each site, estimates of ESLs are based on the high-resolution tide-gauge data, and thus record lengths are the same for both approaches. In general, the AMAX-GEV approach results in higher estimates of ESLs at high return periods and larger uncertainties at the tails of the distributions.

Following a comment from another reviewer, we also considered how this result is affected by the inclusion of historical information:

*“Next, we considered how these estimates are affected by the addition of historical information. We performed the analysis again, but included historical information with measurement uncertainties given by Jensen et al (2022). Results are shown in Figure A2. As with the first analysis, both the POT and AMAX samples are taken from the high-resolution tide-gauge record. For both POT-GP and AMAX-GEV analysis, the introduction of historical information is beneficial in terms of reduced estimate uncertainties. Interestingly, we find that the AMAX-GEV approach performs better in terms of reduced uncertainties at all sites except Schleswig. Differences in the maximum likelihood estimates between the two analyses are much reduced.”*

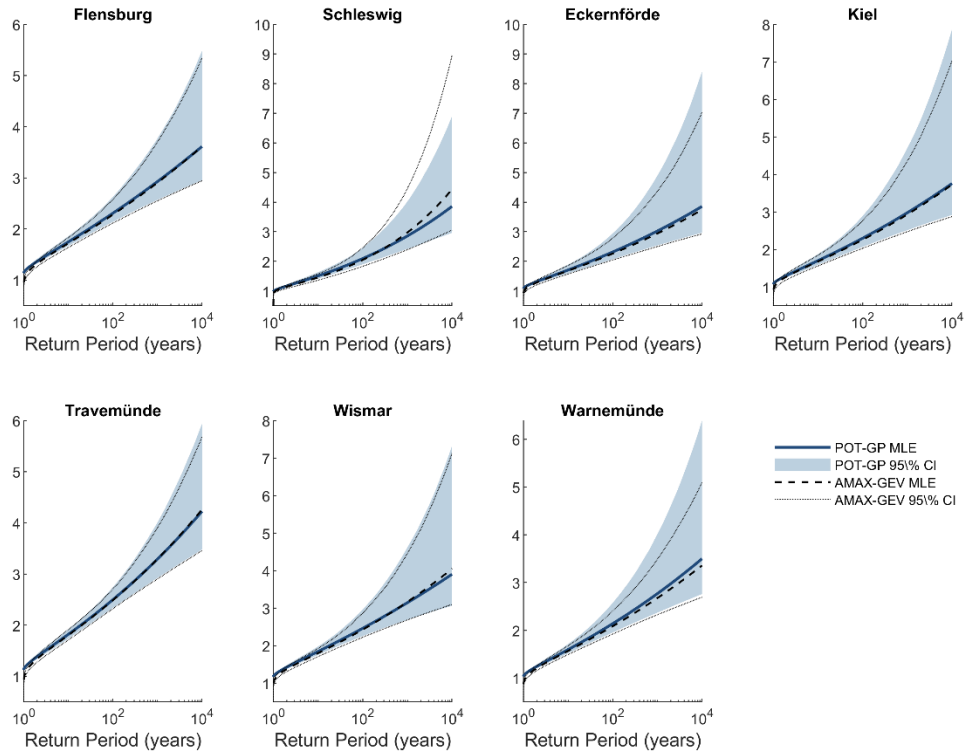

Figure A2. Comparison of POT-GP and AMAX-GEV approaches to the Bayesian MCMC method for estimating ESLs including historical information. At each site, estimates of ESLs are made using the same high-resolution tide-gauge record in combination with historical information. In contrast to results where historical information is omitted, the AMAX-GEV approach performs somewhat better than the POT-GP approach in terms of reduced uncertainties at the distribution tails. Differences in the maximum likelihood estimates between the two methods are much reduced.

We have also included a paragraph dedicated to this in the Discussion:

*“Large differences exist in the estimates of ESLs made using either the POT-GP or AMAX-GEV approaches. While the incorporation of historical information reduces these differences, it does not provide any insight into which method performs best. Indeed, the POT-GP approach is generally preferred in the literature (Arns et al. 2013, Wahl et al. 2017), but this does not necessarily apply to the case of the German Baltic Sea coast. We find that when both methods are constrained to the same record length (see Appendix A), the POT-GP method generally performs better with lower uncertainties at the distribution tails. At all sites, the AMAX-GEV provides larger ESL estimates at high return periods. Interestingly, including historical information in the analysis produces a different result, with the AMAX-GEV analysis providing lower uncertainties at high return periods. One possible explanation for this involves the sampling threshold for the POT method. We assume that this threshold is constant for the full duration of historical and systematic observation, following the study by Bulteau et al. (2018), but this may not be the case. Indeed, large differences in results due to the inclusion of historical information suggests this assumption may be false. Thus, an advantage of the AMAX-GEV approach is that no sampling threshold is required. Given a single sea level record with no historical information, we would recommend the POT-GP approach over the AMAX-GEV due to the reduced estimate uncertainties. However, the AMAX-GEV approach may provide more*

*precise results when historical information is available. Where a longer AMAX record is available, such as in this study, the AMAX-GEV approach provides clearly better results due to the increased data.”*

More importantly, the importance of the inclusion of the 1872 in the AMAX record is shown during the analysis to ESL variability at Travemünde. An example of a tide gauge, where systematic records of this event are not available would further highlight this aspect.

Thankyou for this comment but we believe that an extra example would not necessarily add much to our findings. A tide-gauge record that does not include 1872 would not allow for such a long period of ESL estimates to be made (as seen in Figure 5(a)). Given the length of the AMAX window used in Figure 5 (a), considering only the latter part of the ESL estimates (1943 onwards) is itself an example of a shorter tide-gauge. Furthermore, direct comparisons between the high-resolution tide-gauge data and AMAX records at Travemünde, Wismar and Warnemünde in Figure 4 show the influence of the 1872 event.

The inclusion of historic data is show to also improve the AMAX-GEV analysis at Travemünde, and improvements to the ESL estimate are found, due to the reduction of uncertainties. Analysis of a second tide gauge would give some indication, whether these improvements are similar at the other tide gauges, whether historic data improves POT-GP and AMAX-GEV analysis in a similar way at each tide gauge, and of the potential improvements, if additional historic data becomes available at the other tide gauges.

Unfortunately, Travemünde is the only site where both a long AMAX record and historical information can be found. At Wismar and Warnemünde, where a long AMAX record is available, no information on historical ESLs exist. Despite this, we have since added a comparison of the AMAX-GEV and POT-GP approaches as an Appendix (Appendix A. see above comment) and find that, in general, there are larger benefits to the AMAX-GEV approach in comparison to the POT-GP approach when historical information is included in EVA.

*Discussion (1872 event):* The authors briefly discuss the inclusion of the 1872 event and conclude, that this extreme event should be included in the analysis. This conclusion would strongly benefit from further evidence and discussion, for example by showing the estimated return frequency of the event with and without the inclusion of historical data. Further information should be given, which criteria were previously used to call the event an outlier. Are these criteria still valid or does the inclusion of historical data enable a new way of defining an outlier?

Thankyou for this point. We have expanded on our description of the 1872 event and included a more thorough discussion on its classification as an outlier. In Section 4.1 we have added a table with its estimated return periods:

*“Including historical information also allows for a more reasonable representation of the 1872 event. Table 3 shows the estimated return period in years of the 1872 event at each site and for each analysis. Given only high-resolution tide-gauge data, return period estimates of 1872 are not realistic, suggesting that the event is an outlier. At travemünde, 1872 is estimated to have a return period of more than 500 billion years. Furthermore, no estimates could be made at Flensburg, Schleswig, Eckernförde or Kiel, as the 1872 value is not defined within the maximum likelihood distributions. At Wismar and Warnemünde, estimated return periods are also high at approximately 4 million*

years. When historical information is included, return periods of between 700 and 2860 years are assigned to the 1872 event. These estimates are in the same order of magnitude provided by the AMAX-GEV analyses, which include the 1872 event within the systematic data.”

**Table 3.** Return period estimates (years) of the 1872 event at all sites. Estimates that are 'Undefined' represent values which lie outside the range of the distribution. Values that could not be found due to missing data are shown as dashes (-).

| Site        | POT-GP (Syst.Only)    | POT-GP (Syst. + H.L.) | AMAX-GEV (Syst.Only) | AMAX-GEV (Syst. + H.L.) |
|-------------|-----------------------|-----------------------|----------------------|-------------------------|
| Flensburg   | Undefined             | $1.57 \times 10^3$    | -                    | -                       |
| Schleswig   | Undefined             | $2.86 \times 10^3$    | -                    | -                       |
| Eckernförde | Undefined             | $1.63 \times 10^3$    | -                    | -                       |
| Kiel        | Undefined             | $1.37 \times 10^3$    | -                    | -                       |
| Travemünde  | $5.59 \times 10^{11}$ | $1.90 \times 10^3$    | $6.80 \times 10^3$   | $5.82 \times 10^3$      |
| Wismar      | $3.99 \times 10^6$    | $0.73 \times 10^3$    | $0.90 \times 10^3$   | -                       |
| Warnemünde  | $4.23 \times 10^6$    | $2.29 \times 10^3$    | $6.76 \times 10^3$   | -                       |

And in the discussion:

*“The largest influence on the results of this study is the event of November 1872, which caused exceptionally high water levels along much of the German Baltic coast. Differences in estimates produced using systematic tide-gauge data and AMAX records are largely due to this event. In fact, 1872 was the only event considered in combination with tide-gauge data at three of the seven sites tested, however changes to the maximum likelihood estimates due to its inclusion are not indifferent to results at other sites where multiple historical events are considered. Due to the exceptional magnitude of the event, it has until recently been treated as an outlier and thus excluded from statistical analyses. Hofstede and Hamann (2022) argue that based on the series of AMAX ESLs at Travemünde, 1872 is indeed an outlier given that it is more than 50% higher than the second largest event. Indeed, Mudersbach and Jensen (2009) assessed the return period of a corrected 1872 event at about 10,000 years. However, they concluded that the event could not be well defined statistically given the limited sample population, and suggest extending the available data using historical information. Jensen et al. (2022) highlight the occurrence of events within historical records of similar magnitudes to 1872. Given these events, Jensen et al. (2022) argue that 1872 should not be considered an outlier and that the systematic records are not sufficiently long to deal with events of these magnitudes.*

*When considering the full historical record at Travemünde in combination with high-resolution tide-gauge data, we assess the return period of the 1872 event to be approximately 1,900 years. Combining the long AMAX record with historical information provides a return period estimate of approximately 5,800 years. Given the length of the historical record at Travemünde (approximately 980 years), and the occurrence of other large ESLs within it (1320, 1625, 1694), we agree with the arguments of Jensen et al. (2022) that the 1872 event should not be considered an outlier, but rather an exceptional realisation of the underlying ESL distribution, and we would recommend for its use in EVA. While sea level records that cover a period that includes 1872 can provide very good ESL estimates using traditional EVA methods, only few sufficiently long records exist along the German Baltic coast (including the AMAX records described herein). Despite*



*this, we show that even short tide-gauge records (approximately 30 years in our case) with one measurement of 1872 can provide similar results. Therefore, reconstructions of past extremes offer valuable information with which to improve EVA.”*

*Specific comments:*

*Line 30-32: The mentioned paper of Weiss et al. (2014) uses the concept of homogenous regions for extreme wave height statistics in more offshore areas. Does literature on the feasibility of this method for estimating extreme still water levels exist? I suspect additional challenges posted by the strong influence of coastal bathymetry.*

This method has been applied to estimate extreme still waters with mixed results. I've included two studies where RFA has been applied to still water levels. (Arns et al. 2015, Bardet et al. 2011)

*Line 40: Grammatical error and I suggest a more direct phrasing:  
Despite this, several statistical methods exist to ...  
Changed!*

*Line 62: Missing bracket after the reference to Fig. 1.  
Fixed!*

*Line 72: ... (hereafter referred as HW200) ...  
Fixed!*

*Line 73: ... of past observations, and whose accuracy ...  
Changed!*

*Lines 74-75: At least for Mecklenburg-Western Pomerania additional information is available (MLUV, 2012), which mentions the Gumbel distribution to generally result in the best fit. However, the reassessment of the described methodology conducted in 2021 does not yet seem to be published. Nonetheless, I suggest, extending the description of current design practices. Additionally, the question arises, whether usage of the Gumbel distribution would be a logical addition to the analysis of this paper to enable the most direct comparison to current design practices.*

I have added this information into Section 2.1. As for the Gumbel distribution, this is a special case of the Generalized Extreme Value distribution when the shape parameter ( $\xi$ ) is equal to 0. As we are using the GEV distribution to model the AMAX data, the Gumbel distribution is included. I have included this information in Section 2.2.:

*“A special case of the GEV distribution occurs when the shape parameter is equal to 0. Here, the distribution becomes a Gumbel distribution, which is mentioned by MLUV (2009) as the best fit for ESLs along the Mecklenburg-West Pomeranian coast.”*

*Figure 2: Please provide a point of reference and a definition for the event's magnitude. I presume magnitude refers to the maximum height above MSL.*

It refers to height above NHN, which I have added into the Figure caption.

*Figure 5: The description should include the name of the tide gauge to clarify its context.*

Included!

Line 279: ... series of AMAX ESLs at Travemünde ...

Fixed!

Line 289-290: A question for clarity: does the historical data in this case only refer to historical data from literature or does it also include "historical" values from the AMAX record outside the 70-year window? As a small bump around 1943 is also visible in the "Sys+Hist" plot as well, I would suspect relatively large influence of the inclusion/exclusion of the 1872 event as well.

This does indeed include all events above the perception threshold, from both the historical record and the AMAX dataset. The small jump and dive in the Syst. + Hist. line I assume is due to the way systematic and historical information are handled by the Bayesian MCMC method. As the window passes over the 1872 event, it is handled with some level of uncertainty, which was not the case before.

Line 387: ... Wismar: 63y years ...

Fixed!

Line 388: I suggest using the abbreviation HW200 for consistency:  
... estimates for HW200 increase ...

Changed!

References:

MLUV: Ministerium für Landwirtschaft, Umwelt und Verbraucherschutz Mecklenburg-Vorpommern: Regelwerk Küstenschutz Mecklenburg-Vorpommern - Bemessungswasserstand und Referenzhochwasserstand, Nr. 2-5, <https://www.stalu-mv.de/serviceassistent/download?id=1634742>, 2012

Fixed!
